1 **Abstract**

2 CD38 is a surface ectoenzyme expressed at high levels on myeloma plasma cells and is the target  
3 for the monoclonal antibodies (mAbs) daratumumab and isatuximab. CD38 density on tumor cells  
4 is an important determinant of mAb efficacy, and CD38 loss after mAb treatment may play a role in  
5 resistance. Several small molecules have been found to increase tumor surface CD38, with the goal  
6 of boosting mAb efficacy in a co-treatment strategy. Here we sought to extend our currently limited  
7 insight into CD38 surface expression by using a multi-omics approach. Genome-wide CRISPR-  
8 interference screens integrated with patient-centered epigenetic analysis confirmed known  
9 regulators of *CD38*, such as RARA, while revealing XBP1 and SPI1 as other key transcription  
10 factors governing surface CD38 levels. *CD38* knockdown followed by cell surface proteomics  
11 demonstrated no significant remodeling of the myeloma “surfaceome” after genetically-induced  
12 loss of this antigen. Integrated transcriptome and surface proteome data confirmed high specificity  
13 of all-trans retinoic acid in upregulating CD38 in contrast to broader effects of azacytidine and  
14 panobinostat. Finally, unbiased phosphoproteomics identified inhibition of MAP kinase pathway  
15 signaling in tumor cells after daratumumab treatment. Our work provides a resource to design  
16 strategies to enhance efficacy of CD38-targeting immunotherapies in myeloma.

17

18

## 1 **Introduction**

2 Harnessing the immune system to treat myeloma has rapidly become the most exciting therapeutic  
3 frontier in this disease. The first such immunotherapy agent to achieve United States Food and Drug  
4 Administration (FDA) approval was the monoclonal antibody (mAb) daratumumab<sup>1</sup>. Daratumumab  
5 targets CD38, a cell surface ectoenzyme highly expressed on myeloma plasma cells. Daratumumab  
6 is currently FDA-approved for use as either monotherapy or combination therapy in the  
7 relapsed/refractory setting, or front-line therapy in combination with other small molecule agents<sup>1</sup>.  
8 A second mAb targeting CD38, isatuximab, was also recently approved for relapsed/refractory  
9 myeloma; at least 15 additional CD38-targeting agents are in development<sup>2</sup>. Extensive and  
10 encouraging clinical data has already been obtained with daratumumab, though unfortunately  
11 resistance appears to inevitably occur<sup>3,4</sup>. Biologically, this process appears to be quite complex,  
12 with determinants of resistance ranging from alteration of surface antigens on tumor cells<sup>4-6</sup> to  
13 dysfunction of the tumor immune microenvironment<sup>7</sup>. While it remains unclear whether CD38  
14 downregulation on tumor cells after mAb treatment is a marker of impending resistance<sup>5,8</sup>, or,  
15 instead, a sign of successful therapy<sup>9</sup>, compelling preclinical and clinical data suggests that CD38  
16 surface antigen density prior to treatment strongly correlates with mAb efficacy<sup>5</sup>.

17 This latter observation has led to numerous efforts to identify small molecules which can  
18 increase tumor surface antigen density of CD38, representing potential co-treatments with CD38-  
19 targeting mAbs. The first such example of a CD38-boosting small molecule was all-trans retinoic  
20 acid (ATRA)<sup>10</sup>. These experiments in myeloma were inspired by earlier literature, suggesting that  
21 removal of retinoic acid receptor alpha (RARA) suppression can drive CD38 expression in myeloid  
22 lineage cells<sup>11</sup>. Subsequent studies identified the pan-histone deacetylase (HDAC) inhibitor  
23 panobinostat<sup>12</sup>, the thalidomide analog lenalidomide<sup>13</sup>, and the Janus kinase (JAK) inhibitor  
24 ruxolitinib<sup>14</sup> as agents that could potentially lead to myeloma surface CD38 increase. Based on the  
25 observation that the *CD38* promoter contains an annotated CpG island, possibly repressing  
26 transcription via methylation, we recently demonstrated that the DNA methyltransferase inhibitor  
27 azacytidine (Aza) could also increase surface CD38 and enhance daratumumab efficacy as part of a  
28 co-treatment strategy<sup>15</sup>. We have now opened a clinical trial at our institution to evaluate whether  
29 this combination may also overcome prior daratumumab resistance (NCT04407442). A clinical trial  
30 combining ATRA with daratumumab has led to encouraging outcomes in patients previously  
31 refractory to daratumumab<sup>16</sup>.

1 While these published strategies are certainly cause for optimism about ways to improve  
2 CD38 mAb outcomes, they also leave many questions unanswered. Most notably, we do not yet  
3 have a broad global sense of the transcriptional or post-transcriptional networks that most strongly  
4 impact CD38 expression. There may be alternate strategies to even more potently increase CD38  
5 expression that have not yet been identified. Furthermore, prior studies showed that CD38  
6 downregulation after daratumumab treatment was accompanied by increases in the complement  
7 inhibitors CD55 and CD59<sup>5</sup>. Are there other features of myeloma surface remodeling driven by  
8 CD38 downregulation? And, for the small molecules noted above, it is unknown how they more  
9 generally impact the makeup of the myeloma cell surface proteome beyond CD38. The tumor cell  
10 surface not only harbors opportunities for specific immunotherapeutic targeting but also serves as  
11 the interface for communication between the tumor and its microenvironment, potentially leading to  
12 other alterations in myeloma biology after changes in surface proteomic profile. To address these  
13 questions, here we have taken advantage of CRISPR interference-based functional genomic screens,  
14 cell surface proteomics, epigenetic analyses, and phosphoproteomics to provide a multi-omic  
15 perspective on CD38 regulation and tumor cell consequences of targeting CD38 in myeloma.

16

## 17 **Methods**

### 18 *CRISPR interference screening and hit validation*

19 Genome-wide CRISPRi screening was performed as described previously<sup>17</sup>. Briefly, RPMI-8226  
20 cells stably expressing dCas9-KRAB were transduced with a genome-wide library comprised 5  
21 sgRNA/protein coding gene. After 14 days cells were stained for surface CD38 and flow-sorted to  
22 enrich for populations of cells expressing low or high cell surface levels of CD38. Cell populations  
23 were then processed for next-generation sequencing as previously described<sup>18</sup> and sequenced on a  
24 HiSeq-4000 (Illumina). Reads were analyzed by using the MAGeCK pipeline as previously  
25 described<sup>19</sup>. Further validation was performed by knockdown with individual sgRNA's extracted  
26 from the genome-wide library with confirmation by flow cytometry or Western blotting. Antibody-  
27 dependent cytotoxicity assays were performed using NK92-CD16 cells as described previously<sup>15</sup>.  
28 Additional details in Supplementary Methods.

29

### 30 *Epigenetic analysis and machine learning for CD38 transcriptional regulation*

31 Publicly available ATAC-seq data from primary myeloma samples (ref.<sup>20</sup>) was analyzed with the  
32 Homer tool findPeaks. Motif binding in the identified ATAC peak regions was called with PROMO

1 tool<sup>21</sup>. Newly-diagnosed patient tumor RNA-seq data in the Multiple Myeloma Research  
2 Foundation CoMMpass trial (MMRF; [research.themmr.org](http://research.themmr.org)) was used to correlate expression of  
3 predicted transcription factors with *CD38* expression. To build a predictive model for *CD38*  
4 expression as a function of transcription factor expression, we developed an XGBoost (Extreme  
5 Gradient Boosting) model with randomized search with cross validation to find optimal parameters.  
6 80% of CoMMpass data was used for training and the remainder for model testing. Additional  
7 details in Supplementary Methods.

8

### 9 *Cell surface proteomics and phosphoproteomics*

10 Cell surface proteomics was performed using an adapted version of the *N*-glycoprotein Cell Surface  
11 Capture<sup>22</sup> method, as we have described previously<sup>23</sup>. Unbiased phosphoproteomics was performed  
12 using immobilized metal affinity (IMAC) chromatography using methods described previously<sup>24</sup>.  
13 All samples were analyzed on a Thermo Q-Exactive Plus mass spectrometer with data processing in  
14 MaxQuant<sup>25</sup>. Additional details in Supplementary Methods.

15

## 16 **Results**

### 17 *A CRISPR interference-based screen reveals regulators of CD38 surface expression*

18 We first sought to use an unbiased approach to identify regulators of surface CD38 in myeloma  
19 tumor cells. We specifically employed genome-wide screening with CRISPR interference  
20 (CRISPRi), an approach which leads to much higher specificity of knockdown than shRNA while  
21 avoiding potential toxicity of double-strand breakage with CRISPR deletion<sup>26</sup>. We recently used  
22 this approach to characterize regulators of surface B-cell Maturation Antigen (BCMA) in  
23 myeloma<sup>17</sup>. Here, we employed an RPMI-8226 cell line with the dCas9-KRAB machinery, required  
24 for CRISPRi, as described previously<sup>17</sup>. We confirmed that this RPMI-8226 cell line robustly  
25 expressed CD38 (**Supp. Fig. 1A**).

26 The genome-wide screen was performed as shown in **Fig. 1A**. Briefly, RPMI-8226 cells  
27 were transduced with a pooled genome-wide sgRNA library. After 14 days the cells were then  
28 stained with fluorescently-labeled anti-CD38 antibody and flow sorted into low- and high-CD38  
29 populations. Frequencies of cells expressing each sgRNA was quantified using next generation  
30 sequencing. As an important positive control, increasing confidence in the screen results, we first  
31 noted that knockdown of *CD38* itself strongly decreased surface CD38 expression (**Fig. 1B**). On the  
32 other hand, several dozen genes, when repressed, did indeed lead to increased surface CD38 (right

1 side of volcano plot in **Fig. 1B**; **Supp. Table 1**). As another positive control, one of these top hits  
2 included *RARA*, whose degradation is catalyzed by ATRA treatment to drive CD38 increase<sup>10</sup>.

3 To find pathways that may be useful for pharmacologic targeting, we first applied Gene  
4 Ontology (GO) and Kyoto Encyclopedia of Genes and Genomes (KEGG) analysis to the list of  
5 genes that, when inhibited, significantly increased CD38 (**Fig. 1C**). We were intrigued to find that  
6 many of the strongest effects appeared to be driven by transcriptional or other epigenetic factors.  
7 These specifically included pathways such as “DNA replication”, “mRNA processing”, “DNA-  
8 templated transcription”, and “spliceosome”.

9 We considered whether any hits associated with these pathways may be “druggable”, with  
10 the goal of expanding our repertoire of small molecules that enhance surface CD38 in myeloma.  
11 *SSI8*, a component of the BAF (BRG1/BRM associated factor) chromatin remodeling complex,  
12 scored highly as a hit. However, treatment with the proposed BAF inhibitor caffeic acid phenol  
13 ester (CAPE)<sup>27</sup> did not lead to consistent increases in surface CD38 (**Supp. Fig. 1B**). Similarly, the  
14 lysine demethylase *KDM4A* was a prominent hit, but treatment with the inhibitory metabolite (*R*)-2-  
15 hydroxyglutarate<sup>28</sup> also had no effect (**Supp. Fig. 1B**).

16 The strongest hits for genes whose knockdown increased surface CD38 were two  
17 transcription factors, *HEXIM1* and *TLE3*. While validation studies using individual sgRNA  
18 knockdown confirmed increased surface CD38 (**Fig. 1D**, **Fig. 2A** and **Supp. Fig. 2A**), as well as  
19 functional impact in NK cell antibody-dependent cellular cytotoxicity (ADCC) assays with  
20 daratumumab (**Fig. 2B**), these effects were modest. Furthermore, these proteins are known to be  
21 widespread negative regulators of transcription<sup>29,30</sup>, suggesting little scope for specific therapeutic  
22 targeting at the *CD38* locus, and to our knowledge no small molecule inhibitors of these proteins are  
23 under development. Overall, our screen did not reveal any straightforward alternatives to  
24 pharmacologically increase CD38 beyond those already known.

25 We were surprised that other targets proposed to increase CD38 expression after  
26 pharmacologic inhibition, such as HDACs<sup>3</sup>, or catalyzed degradation, such as IKZF1/3 (ref.<sup>25</sup>), did  
27 not appear as prominent hits (**Fig. 1B**). However, this result may reflect a limitation of functional  
28 genomic screens. A pharmacologic agent may inhibit multiple members of a protein class to drive a  
29 phenotype, whereas, with single gene knockdown, functional redundancy may prevent this  
30 phenotype from appearing<sup>31</sup> (i.e., multiple HDACs may need to be ablated at once, or both IKZF1 and  
31 IKZF3 simultaneously, to drive increased CD38). We speculate this is the case with DNA  
32 methyltransferases (DNMTs). We previously showed that treatment with the DNMT inhibitor

1 azacytidine, which promotes degradation of all cellular DNMTs<sup>32</sup>, could robustly increase surface  
2 CD38<sup>15</sup>. Here, however, we found that knockdown of any individual DNMT only led to minor  
3 CD38 increase (**Fig. 1B**).

4 Given these findings, we therefore shifted our focus to genes that, when knocked down, led  
5 to CD38 decrease (left side of volcano plot in **Fig. 1B**). We reasoned this approach could still reveal  
6 important biological inputs that regulate the surface expression of CD38. Examining specific genes,  
7 we found that the transcription factor *SPI1* was the strongest hit besides *CD38* that, when knocked  
8 down, repressed surface CD38 expression. We also noted that *NFKB1* and *NFKB2* knockdown  
9 appeared to drive CD38 decrease. This finding was intriguing given the known importance of NF-  
10  $\kappa$ B signaling in myeloma proliferation and survival<sup>33</sup>. KEGG and GO analysis of genes whose  
11 knockdown significantly decreased CD38 showed enrichment for MAP kinase pathway and protein  
12 phosphorylation more broadly (**Supp. Fig. 1C**), suggesting key roles for intracellular signaling in  
13 regulating surface CD38.

14 Validation experiments with individual sgRNAs confirmed that *SPI1* knockdown strongly  
15 decreased CD38 surface expression by flow cytometry, with a lesser decrease in surface CD38 with  
16 *NFKB2* knockdown (**Fig. 1D, Fig. 2C, Supp. Fig. 2C-D**). These alterations also led to functional  
17 impacts. RPMI-8226 cells with knockdown of these genes showed significantly decreased NK cell  
18 lysis in ADCC assays (**Fig. 2D**). We further probed this dynamic *in vivo*, finding that RPMI-8226  
19 cells with *SPI1* knockdown were relatively resistant to daratumumab in a murine model (**Fig. 2E**).  
20 We note that we attempted to expand these results to additional cell lines. However, our four other  
21 myeloma cell lines harboring the CRISPRi machinery<sup>17</sup> all express extremely low levels of *SPI1*  
22 (**Supp. Fig. 2B**) and attempted knockdown in two of them (AMO1, KMS12PE) did not elicit any  
23 phenotype (not shown). Therefore, this finding suggests that *SPI1* may play an important role in  
24 regulating CD38 expression in some myeloma tumors, but it is less likely to be a universal  
25 regulator.

26  
27 *Epigenetic analysis suggests XBP1 as a key determinant of CD38 in primary myeloma tumors*

28 Our CRISPRi results suggest that epigenetic and/or transcriptional regulation is a critical  
29 driver of surface CD38 levels. However, we do not know whether these specific hits in a myeloma  
30 cell line will extend to primary myeloma tumors. We therefore took a complementary approach to  
31 find potential transcriptional regulators of *CD38*. Using ATAC-seq data from 24 primary myeloma  
32 tumor samples<sup>20</sup>, we extracted open chromatin motifs near the *CD38* promoter (**Fig. 3A**) to identify

1 a list of 46 transcription factors with potential binding sites at this locus (**Supp. Table 2**). We then  
2 correlated expression (via Pearson  $R$ ) of these transcription factors with *CD38* expression across  
3 664 primary patient tumors at diagnosis in the Multiple Myeloma Research Foundation CoMMpass  
4 database (research.themmr.org; release IA13). In this analysis, we found the transcription factor  
5 most negatively correlated with *CD38* expression was *RARA* (**Fig. 3A**), consistent with our  
6 CRISPRi screen data, and underscoring the promise of ATRA as a co-treatment to increase *CD38*.  
7 Intriguingly, the transcription factor with strongest positive correlation was *XBPI* (**Fig. 3A-B**), a  
8 central driver of plasma cell identity<sup>34</sup>. *XBPI* also showed strong positive correlations with *CD38* in  
9 two other patient tumor gene expression datasets<sup>35,36</sup> (**Supp. Table 2**).

10 To further extend this analysis, we sought to build a predictive model which could estimate  
11 *CD38* transcript level as a function of transcription factor expression. We used an XGBoost method  
12 applied to CoMMpass mRNA-seq data to find weights of transcription factor expression that most-  
13 influence *CD38* levels in patient tumors. We first tested this analysis on 80% of patient data as a  
14 training set with 20% left out as test set. We found this model, solely based on transcription factor  
15 expression, could predict about half of the variance (coefficient of variation  $R^2 = 0.49$  using 5-fold  
16 cross validation) in test set *CD38* levels (**Fig. 3C**). Using model weights and Shapley Additive  
17 Explanations (SHAP) analysis (see Supplementary Methods) to determine transcription factors that  
18 have the greatest impact, either positive or negative, on *CD38* expression, we found that *XBPI*  
19 played the strongest role overall. Other strong hits from both of our analyses included *IRF2*, *ATF1*,  
20 and *STAT1*. *SPI1* also appeared in the top 10 most relevant transcriptional regulators (**Fig. 3D**),  
21 consistent with our CRISPRi results, suggesting that *SPI1* may play a key role in regulating *CD38*  
22 in a subset of tumors.

23 We further evaluated *XBPI* given its prominent role in these two complementary  
24 bioinformatic analyses. Consistent with the hypothesis that *XBPI* regulates *CD38* expression, we  
25 noted in our CRISPRi screen that *XBPI* knockdown indeed led to significant surface *CD38*  
26 decrease (**Fig. 1B**). We further examined a prior dataset of shRNA knockdown of *XBPI* in  
27 myeloma plasma cells<sup>37</sup>. In this independent experiment, *CD38* mRNA was decreased ~3-fold after  
28 *XBPI* silencing (**Supp. Fig. 3C**). Taken together, these results nominate *XBPI* as a particularly  
29 strong determinant of surface *CD38* in myeloma plasma cells, while also supporting a role for *SPI1*  
30 as highlighted in our functional genomic screen.

31

32 *No consistent large-scale remodeling of the myeloma surface proteome after CD38 downregulation*



1 We next evaluated CD38 surface regulation from the perspective of monoclonal antibody  
2 therapy. It has previously been demonstrated that myeloma plasma cells rapidly lose surface CD38  
3 after treatment with daratumumab<sup>5</sup>. In clinical samples, CD38 loss was accompanied by increases in  
4 CD55 and CD59, which may inhibit complement-dependent cytotoxicity and contribute to  
5 daratumumab resistance<sup>5</sup>. In preclinical studies, macrophage trogocytosis has been proposed as a  
6 mechanism contributing to CD38 loss after mAb treatment, that also leads to alterations in other  
7 surface antigens including CD138/SDC1<sup>7</sup>. However, we hypothesized that given its enzymatic  
8 activity and role as a cellular differentiation marker<sup>38</sup>, loss of CD38 on its own may influence  
9 surface expression of other myeloma antigens. Such alterations may reveal new biology or  
10 (immuno)therapeutic vulnerabilities of CD38 mAb-treated disease.

11 To test this hypothesis, we employed a method we recently developed termed “antigen  
12 escape profiling”<sup>23</sup>. We used CRISPRi to transcriptionally repress *CD38* in RPMI-8226, AMO-1,  
13 and KMS12-PE myeloma cell lines, using this genetic approach to partially mimic loss of surface  
14 antigen seen after mAb therapy (**Fig. 4A**). We then performed Cell Surface Capture proteomics<sup>22,23</sup>  
15 to uncover surface proteome alterations in a relatively unbiased fashion. Across cell lines, analyzed  
16 in biological triplicate with *CD38* knockdown vs. non-targeting sgRNA, we quantified 897 proteins  
17 annotated as membrane-spanning in Uniprot (minimum of two peptides per protein) (**Supp. Table**  
18 **3**). As a positive control, in all lines we found that the strongest signature was decrease of CD38  
19 itself (**Supp. Fig. 4A-C**). Initial analysis of the data suggested potential alterations across several  
20 dozen other surface proteins (**Supp. Fig. 4A-C**). However, there was notable heterogeneity across  
21 cell lines; when aggregating proteomic data, we found no significant alterations in any surface  
22 antigens beyond CD38 (**Fig. 4B**). Integration with RNA-seq data on the same samples allowed us to  
23 identify transcriptionally-regulated changes also present at the surface protein level (**Supp. Table**  
24 **3**). This analysis revealed only THY-1/CD90 as upregulated >3-fold at both the mRNA and surface  
25 proteomic level after *CD38* knockdown (**Fig. 4C**). Intriguingly, CD90 is known as a marker of  
26 “stemness” in early hematopoietic lineage cells that is lost when CD38 expression is increased<sup>39</sup>.  
27 CoMMpass analysis also confirmed increased *THY1* expression in tumors with lower *CD38* (**Supp.**  
28 **Fig. 4D**). However, further validation as to whether CD90 is truly altered after CD38 mAb will  
29 require pre- and post-treatment clinical specimens, beyond the scope of our work here. Overall, we  
30 conclude that loss of CD38 in isolation leads to only minor, if any, consistent remodeling of the  
31 myeloma surface proteome.

32

1 *Integrated surface proteomic and transcriptional analysis suggests ATRA is highly specific in CD38*  
2 *upregulation*

3 Data from our group<sup>15</sup> and others<sup>10,12-14</sup> have suggested that several small molecules can  
4 increase myeloma surface CD38. However, the broader impacts of these agents on membrane  
5 antigens beyond CD38 have not been directly compared. We performed integrated cell surface  
6 proteomics and transcriptional analysis of RPMI-8226 cells treated with 10 nM all-trans retinoic  
7 acid (ATRA), 2  $\mu$ M azacitidine (Aza), and 10 nM Panobinostat (Pano), all treated for 72 hr, in  
8 comparison to DMSO (**Supp. Table 4**). These doses are chosen as they have been previously  
9 published to significantly increase myeloma surface CD38 by flow cytometry<sup>10,12,15</sup>. In this  
10 integrated analysis we found much broader impacts of azacytidine and panobinostat than ATRA on  
11 the “surfaceome” of plasma cells. For example, after ATRA, no genes showed greater than 4-fold  
12 (2-fold on log<sub>2</sub> scale) expression change for membrane protein-coding genes, unlike prominent  
13 changes above this threshold for Aza and Pano (**Fig. 5A**). However, CD38 was one of the few genes  
14 detectably upregulated at both the proteomic and mRNA level after ATRA. This observation  
15 appears consistent with the known mechanism of action for these small molecules. ATRA is  
16 expected to only influence the small subset of genes, including CD38, that are transcriptionally  
17 regulated by the retinoic acid receptor<sup>40</sup>. In contrast, Aza and pano are expected to drive broad  
18 changes in epigenetic regulation across the genome<sup>32,41</sup>. These results suggest that, at doses driving  
19 CD38 upregulation, for Aza or pano altering CD38 is just a small component of their impact on  
20 myeloma tumor cells, whereas ATRA is much more specific in driving CD38 upregulation with  
21 minimal other cellular impacts.

22 Toward understanding how CD38 is modulated after drug treatment, in our previous work<sup>15</sup>  
23 we noted that the mechanism of *CD38* increase after Aza treatment was unclear. We thus further  
24 investigated the global transcriptional response (i.e. not limited to membrane protein-coding genes)  
25 after Aza (**Supp. Table 4**). Prior studies have suggested that the anti-tumor effect of Aza is largely  
26 mediated by reactivation of endogenous retroviruses, thus stimulating a tumor-autonomous  
27 interferon response ultimately leading to apoptosis<sup>42,43</sup>. Consistent with this work in other model  
28 systems, in this myeloma model we found a pronounced increase in interferon-responsive genes  
29 after Aza, but not ATRA, treatment including *IRF1*, *IFITM1*, *IFITM2*, and *IFITM3* (**Fig. 5B**).  
30 KEGG analysis also confirmed this effect, where pathways most significantly upregulated after Aza  
31 treatment were related to response to bacterial or viral infection (**Fig. 5C**). Given evidence across  
32 multiple systems that interferon upregulates *CD38* expression<sup>44-46</sup>, our transcriptional profiling data

1 also supports an interferon-based mechanism driving surface CD38 increase in plasma cells after  
2 Aza treatment. This proposed mechanism is also consistent with our prior observation that the  
3 *CD38* promoter exhibits minimal methylation at baseline in myeloma plasma cells<sup>15</sup>, making it  
4 unlikely that direct demethylation of the *CD38* CpG island is the primary driver of increased *CD38*  
5 transcription after Aza.

6

### 7 *Plasma cell proliferative signaling pathways are inhibited by mAb binding to CD38*

8 In our final set of experiments related to targeting surface CD38, we were intrigued as to  
9 whether binding of a therapeutic mAb leads to specific cellular phenotypes within myeloma plasma  
10 cells. For example, isatuximab is known to directly lead to apoptosis of plasma cells<sup>47</sup>, and  
11 daratumumab can do so after crosslinking<sup>48</sup>. However, the mechanism underlying this transduction  
12 of extracellular mAb binding to intracellular phenotype remains unclear. In addition, our CRISPRi  
13 screen data (**Fig. 1B and Supp. Fig. 1C**) suggests that surface CD38 expression may be strongly  
14 impacted by intracellular phospho-signaling pathways.

15 Therefore, we used unbiased phosphoproteomics by mass spectrometry to probe intracellular  
16 signaling effects driven by CD38 mAb binding. In RPMI-8226 cells we compared 20 uM  
17 daratumumab treatment vs. IgG1 isotype control. We chose a time point of 20 minutes of treatment  
18 given known rapid alterations in signaling pathways in similar phosphoproteomic experiments<sup>49</sup>. In  
19 total, across triplicate samples we quantified 5430 phosphopeptides (**Supp. Table 5; Supp. Fig.**  
20 **5A**). Analyzing phosphopeptide changes by Kinase Substrate Enrichment Analysis (KSEA)<sup>50</sup>, we  
21 were intrigued to find downregulation of phosphorylation motifs consistent with both cyclin-  
22 dependent kinases as well as several kinases of the MAP kinase pathway (**Fig. 6A**). Downregulation  
23 of phosphorylation on several central nodes in the MAP kinase as well as AKT pathway was also  
24 apparent via KEGG analysis (**Supp. Fig. 5B**). Across a time course we further confirmed effects on  
25 MAP kinase pathway (reported by phosphorylation of MAPK (ERK1/2), a key node in this  
26 response) and AKT signaling after daratumumab treatment via Western blotting in RPMI-8226 and  
27 MM.1S cell lines, respectively (**Fig. 6B**). While the absolute value of changes in MAPK signaling  
28 are modest, both by phosphoproteomics and Western blot, these results indicate that daratumumab  
29 binding to CD38 can at least partially inhibit this central proliferative pathway within myeloma  
30 tumor cells, and thus may form a component of daratumumab's anti-tumor effect.

31

## 32 **Discussion**

1 Our studies here present a “multi-omics” view of therapeutically targeting CD38 in multiple  
2 myeloma. Our integrated functional genomics and epigenetic analysis point to the central role of  
3 transcriptional regulators in governing CD38 surface expression at baseline. Using cell surface  
4 proteomics, we further identify that loss of CD38 in isolation is unlikely to drive large changes in  
5 the cell surface proteome, while known drug treatment strategies to increase CD38 have largely  
6 divergent impacts on other surface antigens. Finally, unbiased phosphoproteomics reveals that  
7 binding of anti-CD38 mAb can impair intracellular proliferative signaling within plasma cells.

8 Our initial CRISPRi screen illustrated the central role of numerous transcription factors,  
9 such as SPI1, HEXIM1, and TLE3, in regulating surface CD38. This functional genomic study  
10 suggests that regulation of surface CD38 largely occurs at the transcriptional, as opposed to protein  
11 trafficking, level. This finding was in sharp contrast to our prior CRISPRi results with BCMA,  
12 where we found that post-transcriptional mechanisms, such as proteolytic cleavage by  $\gamma$ -secretase  
13 and protein trafficking via the SEC61 translocon, played some of the strongest roles in determining  
14 surface BCMA levels<sup>17</sup>.

15 Another recent study used genome-wide CRISPR deletion screening to find genes that,  
16 when knocked out, could abrogate IL-6-mediated downregulation of surface CD38 (ref.<sup>14</sup>). The  
17 strongest hits in this prior study included the transcription factors *STAT1* and *STAT3*, demonstrating  
18 a role for JAK-STAT signaling in regulating tumor CD38 expression within the bone marrow  
19 microenvironment<sup>14</sup>. In support of this notion, our integrated epigenetic and machine learning  
20 analyses, extracted from bone marrow-derived patient tumor samples, also support a critical role for  
21 STAT1 in governing surface CD38. However, in our CRISPRi screen in an *in vitro* monoculture  
22 system, neither *STAT1* or *STAT3* affected CD38 surface expression (**Fig. 1B**). This result suggests  
23 that JAK-STAT signaling may not play a major role in CD38 regulation in the absence of  
24 exogenous tumor stimulation. This finding illustrates the complementary nature of our genome-  
25 wide screen to that previously published under the context of IL-6 stimulation<sup>14</sup>.

26 Toward the goal of finding key regulators of CD38 that were not previously known, our  
27 epigenetic and machine learning approaches suggest that *XBPI* may be a critical regulator of  
28 plasma cell *CD38*. While this initial analysis of primary samples only demonstrates correlation in  
29 gene expression, our CRISPRi screen, as well as the independent experiment of Leung-Hagesteijn  
30 et al<sup>37</sup>, both suggest that genetic knockdown of *XBPI* does directly lead to CD38 decrease,  
31 supporting a true functional relationship. Further exploring the connection between XBPI and

1 CD38 will be an intriguing avenue for future studies. Dissecting this interaction may ultimately lead  
2 to new strategies to increase surface CD38 in myeloma plasma cells via modulating XBP1.

3 Given that it is now well-known that plasma cells demonstrate strong downregulation of  
4 CD38 after daratumumab treatment<sup>5</sup>, a pressing clinical question is whether CD38-low,  
5 daratumumab-resistant cells have novel immunotherapeutic vulnerabilities. However, our recently-  
6 described strategy of “antigen escape profiling”<sup>23</sup> – CRISPRi knockdown followed by unbiased cell  
7 surface proteomics (**Fig. 4**) – suggests that other cell surface antigens on plasma cells do not exhibit  
8 consistent changes due to CD38 downregulation alone. This finding supports the notion that  
9 alterations in surface proteins found after mAb treatment on patient tumors, such as increases in  
10 CD55 and CD59 (ref.<sup>5</sup>), are caused by other therapy-induced selective pressure within the tumor  
11 microenvironment, not CD38 loss.

12 Also directly related to mAb therapeutic effects, our unbiased phosphoproteomic results  
13 suggest that daratumumab binding to CD38 can directly decrease signaling along the MAP kinase  
14 and PI3K-AKT pathways. While these findings were confirmed by Western blot in both RPMI-  
15 8226 and MM.1S cells, we note that both of these cell lines harbor mutations in *KRAS*<sup>24</sup>. It is  
16 unclear if similar intracellular signaling effects occur in myeloma tumors without MAPK-pathway  
17 mutations. Furthermore, it remains to be investigated whether this inhibition of central proliferative  
18 signaling pathways plays a role in the anti-tumor effect of daratumumab in patients. It will be  
19 interesting to address this question in future studies.

20 In terms of limitations of our work, the most prominent is that the many of our studies are  
21 derived from large-scale “omics” experiments in myeloma cell lines. There may be biological  
22 differences between our findings *in vitro* and primary tumors growing within the bone marrow  
23 microenvironment.

24 Taken together, our multi-omic studies comprise a resource that reveals new insight into the  
25 genetic, epigenetic, and pharmacologic regulation of surface CD38 in myeloma plasma cells. We  
26 anticipate these findings will have utility in deriving new strategies to enhance CD38 mAb efficacy  
27 or to overcome resistance to these agents.

28

29 **Acknowledgements:** We thank Ruilin Tian for assistance in modifying MAGeCK scripts for the  
30 analysis here. This work was supported by grants K08 CA184116, R01 CA226851, and the UCSF  
31 Stephen and Nancy Grand Multiple Myeloma Translational Initiative (to A.P.W.), NCI P30

1 CA082103 supporting the Preclinical Therapeutics Core facility (managed by V.Steri and B.H.),  
2 and K99/R00 CA181494 and a Stand Up to Cancer Innovative Research Grant (to M.K.).

3  
4 **Author Contributions:** P.C., P.R., M.K., and A.P.W. conceived and designed the study. P.C.,  
5 O.G., L.S., Y-H.T.L., P.R., N.P., and M.M. performed experiments. P.C., N.P., Y-H.T.L., and P.R.  
6 analyzed data. D.W., P.P., V. Steri, and B.H. performed murine studies. H.G. analyzed patient  
7 epigenetic data. V. Sarin performed machine learning analysis. P.C. and A.P.W. wrote the  
8 manuscript with input from all authors.

9  
10 **Disclosures:** P.C. is currently an employee and shareholder of Genentech/Roche, though during the  
11 time of completing this project she was fully employed by the University of California, San  
12 Francisco. P.R. is currently an employee and shareholder of Senti Biosciences, though during the  
13 time of completing this project she was fully employed by the University of California, San  
14 Francisco. A.P.W. is an equity holder and scientific advisory board member of Indapta  
15 Therapeutics, LLC and Protocol Intelligence, LLC. M.K. has filed a patent application related to  
16 CRISPRi screening (PCT/US15/40449); and serves on the Scientific Advisory Boards of Engine  
17 Biosciences, Cajal Neuroscience and Casma Therapeutics. The other authors declare no relevant  
18 conflicts of interest.

19  
20

## 1 REFERENCES:

- 2 1 Syed, Y. Y. Daratumumab: A Review in Combination Therapy for Transplant-Ineligible  
3 Newly Diagnosed Multiple Myeloma. *Drugs* **79**, 447-454, doi:10.1007/s40265-019-01080-6  
4 (2019).
- 5 2 Bonello, F. *et al.* CD38 as an immunotherapeutic target in multiple myeloma. *Expert Opin*  
6 *Biol Ther* **18**, 1209-1221, doi:10.1080/14712598.2018.1544240 (2018).
- 7 3 van de Donk, N. & Usmani, S. Z. CD38 Antibodies in Multiple Myeloma: Mechanisms of  
8 Action and Modes of Resistance. *Front Immunol* **9**, 2134, doi:10.3389/fimmu.2018.02134  
9 (2018).
- 10 4 Saltarella, I. *et al.* Mechanisms of Resistance to Anti-CD38 Daratumumab in Multiple  
11 Myeloma. *Cells* **9**, doi:10.3390/cells9010167 (2020).
- 12 5 Nijhof, I. S. *et al.* CD38 expression and complement inhibitors affect response and  
13 resistance to daratumumab therapy in myeloma. *Blood* **128**, 959-970, doi:10.1182/blood-  
14 2016-03-703439 (2016).
- 15 6 Overdijk, M. B. *et al.* Antibody-mediated phagocytosis contributes to the anti-tumor activity  
16 of the therapeutic antibody daratumumab in lymphoma and multiple myeloma. *mAbs* **7**, 311-  
17 321, doi:10.1080/19420862.2015.1007813 (2015).
- 18 7 Krejcik, J. *et al.* Daratumumab depletes CD38+ immune regulatory cells, promotes T-cell  
19 expansion, and skews T-cell repertoire in multiple myeloma. *Blood* **128**, 384-394,  
20 doi:10.1182/blood-2015-12-687749 (2016).
- 21 8 Krejcik, J. *et al.* Monocytes and Granulocytes Reduce CD38 Expression Levels on Myeloma  
22 Cells in Patients Treated with Daratumumab. *Clin Cancer Res* **23**, 7498-7511,  
23 doi:10.1158/1078-0432.CCR-17-2027 (2017).
- 24 9 Plesner, T., van de Donk, N. & Richardson, P. G. Controversy in the Use of CD38 Antibody  
25 for Treatment of Myeloma: Is High CD38 Expression Good or Bad? *Cells* **9**,  
26 doi:10.3390/cells9020378 (2020).
- 27 10 Nijhof, I. S. *et al.* Upregulation of CD38 expression on multiple myeloma cells by all-trans  
28 retinoic acid improves the efficacy of daratumumab. *Leukemia* **29**, 2039-2049,  
29 doi:10.1038/leu.2015.123 (2015).
- 30 11 Drach, J., Zhao, S., Malavasi, F. & Mehta, K. Rapid induction of CD38 antigen on myeloid  
31 leukemia cells by all trans-retinoic acid. *Biochem Biophys Res Comm* **195**, 545-550,  
32 doi:10.1006/bbrc.1993.2080 (1993).
- 33 12 Garcia-Guerrero, E. *et al.* Panobinostat induces CD38 upregulation and augments the  
34 antimyeloma efficacy of daratumumab. *Blood* **129**, 3386-3388, doi:10.1182/blood-2017-03-  
35 770776 (2017).
- 36 13 Fedele, P. L. *et al.* IMiDs prime myeloma cells for daratumumab-mediated cytotoxicity  
37 through loss of Ikaros and Aiolos. *Blood* **132**, 2166-2178, doi:10.1182/blood-2018-05-  
38 850727 (2018).
- 39 14 Ogiya, D. *et al.* The JAK-STAT pathway regulates CD38 on myeloma cells in the bone  
40 marrow microenvironment: therapeutic implications. *Blood* **136**, 2334-2345,  
41 doi:10.1182/blood.2019004332 (2020).
- 42 15 Choudhry, P. *et al.* DNA methyltransferase inhibitors upregulate CD38 protein expression  
43 and enhance daratumumab efficacy in multiple myeloma. *Leukemia* **34**, 938-941,  
44 doi:10.1038/s41375-019-0587-5 (2020).
- 45 16 Frerichs, K. A. *et al.* Efficacy and Safety of Daratumumab Combined with All-Trans  
46 Retinoic Acid in Relapsed/Refractory Multiple Myeloma; Results of the Phase 1/2  
47 Dara/ATRA Study. *Blood (ASH Abstract)* **134**, 1826 (2019).

- 1 17 Ramkumar, P. *et al.* CRISPR-based screens uncover determinants of immunotherapy  
2 response in multiple myeloma. *Blood Adv* **4**, 2899-2911,  
3 doi:10.1182/bloodadvances.2019001346 (2020).
- 4 18 Kampmann, M., Bassik, M. C. & Weissman, J. S. Functional genomics platform for pooled  
5 screening and generation of mammalian genetic interaction maps. *Nat Protoc* **9**, 1825-1847,  
6 doi:10.1038/nprot.2014.103 (2014).
- 7 19 Tian, R. *et al.* CRISPR Interference-Based Platform for Multimodal Genetic Screens in  
8 Human iPSC-Derived Neurons. *Neuron* **104**, 239-255 e212,  
9 doi:10.1016/j.neuron.2019.07.014 (2019).
- 10 20 Jin, Y. *et al.* Active enhancer and chromatin accessibility landscapes chart the regulatory  
11 network of primary multiple myeloma. *Blood* **131**, 2138-2150, doi:10.1182/blood-2017-09-  
12 808063 (2018).
- 13 21 Messeguer, X. *et al.* PROMO: detection of known transcription regulatory elements using  
14 species-tailored searches. *Bioinformatics* **18**, 333-334, doi:10.1093/bioinformatics/18.2.333  
15 (2002).
- 16 22 Wollscheid, B. *et al.* Mass-spectrometric identification and relative quantification of N-  
17 linked cell surface glycoproteins. *Nat Biotechnol* **27**, 378-386, doi:10.1038/nbt.1532 (2009).
- 18 23 Nix, M. A. *et al.* Surface proteomics reveals CD72 as a target for in vitro-evolved  
19 nanobody-based CAR-T cells in KMT2A/MLL1-rearranged B-ALL. *Cancer Discov*,  
20 doi:10.1158/2159-8290.CD-20-0242 (2021).
- 21 24 Lin, Y. T. *et al.* Integrated phosphoproteomics and transcriptional classifiers reveal hidden  
22 RAS signaling dynamics in multiple myeloma. *Blood Adv* **3**, 3214-3227,  
23 doi:10.1182/bloodadvances.2019000303 (2019).
- 24 25 Tyanova, S., Temu, T. & Cox, J. The MaxQuant computational platform for mass  
25 spectrometry-based shotgun proteomics. *Nat Protoc* **11**, 2301-2319,  
26 doi:10.1038/nprot.2016.136 (2016).
- 27 26 Gilbert, L. A. *et al.* Genome-Scale CRISPR-Mediated Control of Gene Repression and  
28 Activation. *Cell* **159**, 647-661, doi:10.1016/j.cell.2014.09.029 (2014).
- 29 27 Dykhuizen, E. C., Carmody, L. C., Tolliday, N., Crabtree, G. R. & Palmer, M. A. Screening  
30 for inhibitors of an essential chromatin remodeler in mouse embryonic stem cells by  
31 monitoring transcriptional regulation. *J Biomol Screen* **17**, 1221-1230,  
32 doi:10.1177/10870571112455060 (2012).
- 33 28 Carbonneau, M. *et al.* The oncometabolite 2-hydroxyglutarate activates the mTOR  
34 signalling pathway. *Nat Commun* **7**, 12700, doi:10.1038/ncomms12700 (2016).
- 35 29 Michels, A. A. & Bensaude, O. Hexim1, an RNA-controlled protein hub. *Transcription* **9**,  
36 262-271, doi:10.1080/21541264.2018.1429836 (2018).
- 37 30 Cinnamon, E. & Paroush, Z. Context-dependent regulation of Groucho/TLE-mediated  
38 repression. *Curr Opin Genet Dev* **18**, 435-440, doi:10.1016/j.gde.2008.07.010 (2008).
- 39 31 Agrotis, A. & Ketteler, R. A new age in functional genomics using CRISPR/Cas9 in arrayed  
40 library screening. *Front Genet* **6**, 300, doi:10.3389/fgene.2015.00300 (2015).
- 41 32 Gnyszka, A., Jastrzebski, Z. & Flis, S. DNA methyltransferase inhibitors and their emerging  
42 role in epigenetic therapy of cancer. *Anticancer Res* **33**, 2989-2996 (2013).
- 43 33 Matthews, G. M. *et al.* NF-kappaB dysregulation in multiple myeloma. *Semin Cancer Biol*  
44 **39**, 68-76, doi:10.1016/j.semcancer.2016.08.005 (2016).
- 45 34 Reimold, A. M. *et al.* Plasma cell differentiation requires the transcription factor XBP-1.  
46 *Nature* **412**, 300-307, doi:10.1038/35085509 (2001).



- 1 35 Mulligan, G. *et al.* Gene expression profiling and correlation with outcome in clinical trials  
2 of the proteasome inhibitor bortezomib. *Blood* **109**, 3177-3188, doi:10.1182/blood-2006-09-  
3 044974 (2007).
- 4 36 Shi, L. *et al.* The MicroArray Quality Control (MAQC)-II study of common practices for the  
5 development and validation of microarray-based predictive models. *Nat Biotechnol* **28**, 827-  
6 838, doi:10.1038/nbt.1665 (2010).
- 7 37 Leung-Hagesteijn, C. *et al.* Xbp1s-negative tumor B cells and pre-plasmablasts mediate  
8 therapeutic proteasome inhibitor resistance in multiple myeloma. *Cancer Cell* **24**, 289-304,  
9 doi:10.1016/j.ccr.2013.08.009 (2013).
- 10 38 Li, Y., Yang, R., Chen, L. & Wu, S. CD38 as an immunomodulator in cancer. *Future Oncol*  
11 **16**, 2853-2861, doi:10.2217/fon-2020-0401 (2020).
- 12 39 Majeti, R., Park, C. Y. & Weissman, I. L. Identification of a hierarchy of multipotent  
13 hematopoietic progenitors in human cord blood. *Cell Stem Cell* **1**, 635-645,  
14 doi:10.1016/j.stem.2007.10.001 (2007).
- 15 40 Giuli, M. V. *et al.* Current Trends in ATRA Delivery for Cancer Therapy. *Pharmaceutics*  
16 **12**, doi:10.3390/pharmaceutics12080707 (2020).
- 17 41 Ganai, S. A. Panobinostat: The Small Molecule Metalloenzyme Inhibitor with Marvelous  
18 Anticancer Activity. *Curr Top Med Chem* **16**, 427-434,  
19 doi:10.2174/1568026615666150813145800 (2016).
- 20 42 Chiappinelli, K. B. *et al.* Inhibiting DNA Methylation Causes an Interferon Response in  
21 Cancer via dsRNA Including Endogenous Retroviruses. *Cell* **162**, 974-986,  
22 doi:10.1016/j.cell.2015.07.011 (2015).
- 23 43 Roulois, D. *et al.* DNA-Demethylating Agents Target Colorectal Cancer Cells by Inducing  
24 Viral Mimicry by Endogenous Transcripts. *Cell* **162**, 961-973,  
25 doi:10.1016/j.cell.2015.07.056 (2015).
- 26 44 Mihara, K. *et al.* All-trans retinoic acid and interferon-alpha increase CD38 expression on  
27 adult T-cell leukemia cells and sensitize them to T cells bearing anti-CD38 chimeric antigen  
28 receptors. *Blood Cancer J* **6**, e421, doi:10.1038/bcj.2016.30 (2016).
- 29 45 Bauvois, B. *et al.* Upregulation of CD38 gene expression in leukemic B cells by interferon  
30 types I and II. *J Interferon Cytokine Res* **19**, 1059-1066, doi:10.1089/107999099313299  
31 (1999).
- 32 46 Frasca, L. *et al.* IFN-gamma arms human dendritic cells to perform multiple effector  
33 functions. *J Immunol* **180**, 1471-1481, doi:10.4049/jimmunol.180.3.1471 (2008).
- 34 47 Moreno, L. *et al.* The Mechanism of Action of the Anti-CD38 Monoclonal Antibody  
35 Isatuximab in Multiple Myeloma. *Clin Cancer Res* **25**, 3176-3187, doi:10.1158/1078-  
36 0432.CCR-18-1597 (2019).
- 37 48 Overdijk, M. B. *et al.* The Therapeutic CD38 Monoclonal Antibody Daratumumab Induces  
38 Programmed Cell Death via Fcγ Receptor-Mediated Cross-Linking. *J Immunol* **197**,  
39 807-813, doi:10.4049/jimmunol.1501351 (2016).
- 40 49 Humphrey, S. J., Azimifar, S. B. & Mann, M. High-throughput phosphoproteomics reveals  
41 in vivo insulin signaling dynamics. *Nat Biotechnol* **33**, 990-995, doi:10.1038/nbt.3327  
42 (2015).
- 43 50 Casado, P. *et al.* Kinase-substrate enrichment analysis provides insights into the  
44 heterogeneity of signaling pathway activation in leukemia cells. *Sci Signal* **6**, rs6,  
45 doi:10.1126/scisignal.2003573 (2013).
- 46 51 Li, W. *et al.* MAGeCK enables robust identification of essential genes from genome-scale  
47 CRISPR/Cas9 knockout screens. *Genome Biol* **15**, 554, doi:10.1186/s13059-014-0554-4  
48 (2014).

1

## FIGURE 1

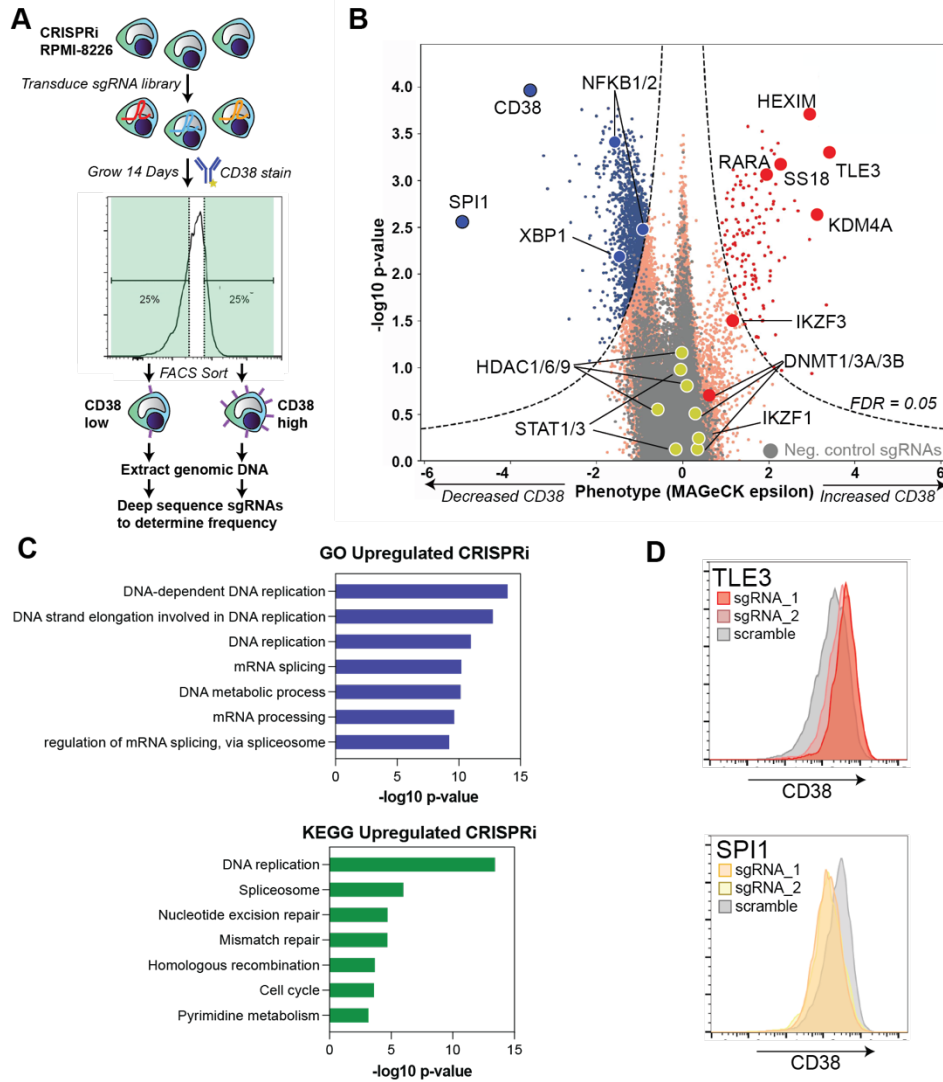

2  
3  
4  
5  
6  
7  
8  
9  
10  
11  
12  
13

**Figure 1. CRISPR interference (CRISPRi) screening reveals genetic determinants of surface CD38 regulation.** **A.** Schematic of CRISPRi screen design. **B.** Results of CRISPRi screen demonstrating genes that, when knocked down, regulate surface CD38 in RPMI-8226 cells. X-axis indicates phenotype (epsilon) from MAGECK<sup>51</sup> statistical analysis. Dashed line indicates cutoff for significant change at False Discovery Rate (FDR) < 0.05. Genes of interest are specifically labeled. 4,000 negative control non-targeting sgRNAs are in grey. **C.** Gene Ontology (GO) Biological Process and Kyoto Encyclopedia of Genes and Genomes (KEGG) analysis of all genes that when knocked down lead to significant CD38 upregulation. **D.** Follow-up flow cytometry validation of CRISPRi screen hits using two individual sgRNAs per gene demonstrates *TLE3* knockdown drives increased CD38, while *SPI1* knockdown leads to CD38 decrease.

**FIGURE 2**

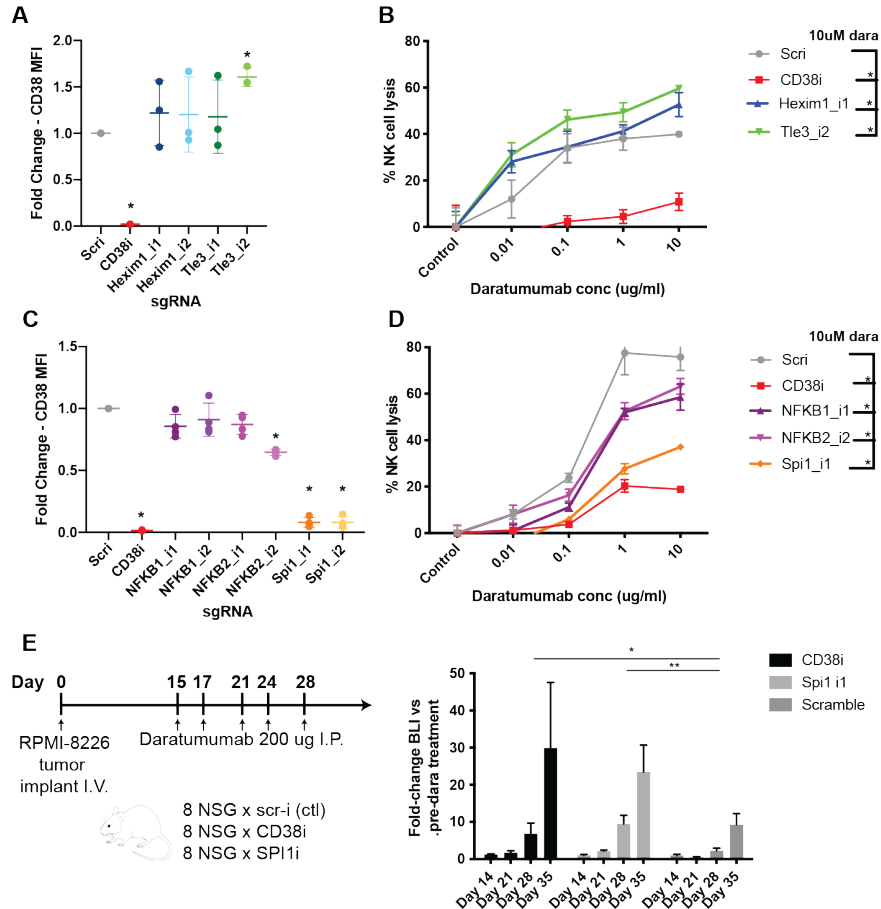

1  
2  
3 **Figure 2. Validation of CRISPRi screen hits as functionally impacting daratumumab efficacy.**  
4 **A.** Knockdown of HEXIM1 and TLE3 with two independent sgRNA's/gene (AMO1 myeloma  
5 cells,  $n = 3$ ) followed by flow cytometry shows significant surface CD38 increase with TLE3\_i2  
6 sgRNA and trend toward increased CD38 with HEXIM1\_i1 sgRNA. Scri = non-targeting control  
7 sgRNA. **B.** Results from ADCC assays with AMO1 cells stably expressing the noted sgRNA's and  
8 incubated with the indicated concentration of daratumumab or isotype control antibody (1:20  
9 myeloma:NK ratio, 20 hours,  $n = 2$ ). The percent lysis by ADCC was calculated as outlined in the  
10 Supplemental methods. . At 10  $\mu$ M daratumumab, both HEXIM1 and TLE3 knockdown led to  
11 significant increase in ADCC. **C.** Similar to A., sgRNA knockdown of *NFKB1*, *NFKB2*, and *SPI1*  
12 with fold-change in CD38 by flow cytometry (RPMI-8226 cells,  $n = 3$ ). **D.** Similar to B.,  
13 knockdown with the most effective sgRNA for each gene show significant decreases in NK-cell  
14 ADCC at 10  $\mu$ M daratumumab in the RMPI-8266 cells ( $n = 2$ ). **E.** *In vivo* validation of *SPI1*  
15 knockdown driving daratumumab resistance. NOD *scid* gamma mice were I.V. implanted with  
16 CRISPRi RPMI-8226 cells stably expressing both luciferase and noted sgRNA, then treated with  
17 200  $\mu$ g daratumumab on the noted schedule. Bioluminescence imaging measurement of tumor  
18 burden demonstrates significantly increased fold-change in tumor burden (normalized to pre-  
19 daratumumab intensity) with either CD38 or SPI1 knockdown compared to scramble sgRNA. For  
20 **A-E**, \* $p < 0.05$ , \*\* $p < 0.01$  by two-tailed *t*-test.

## FIGURE 3

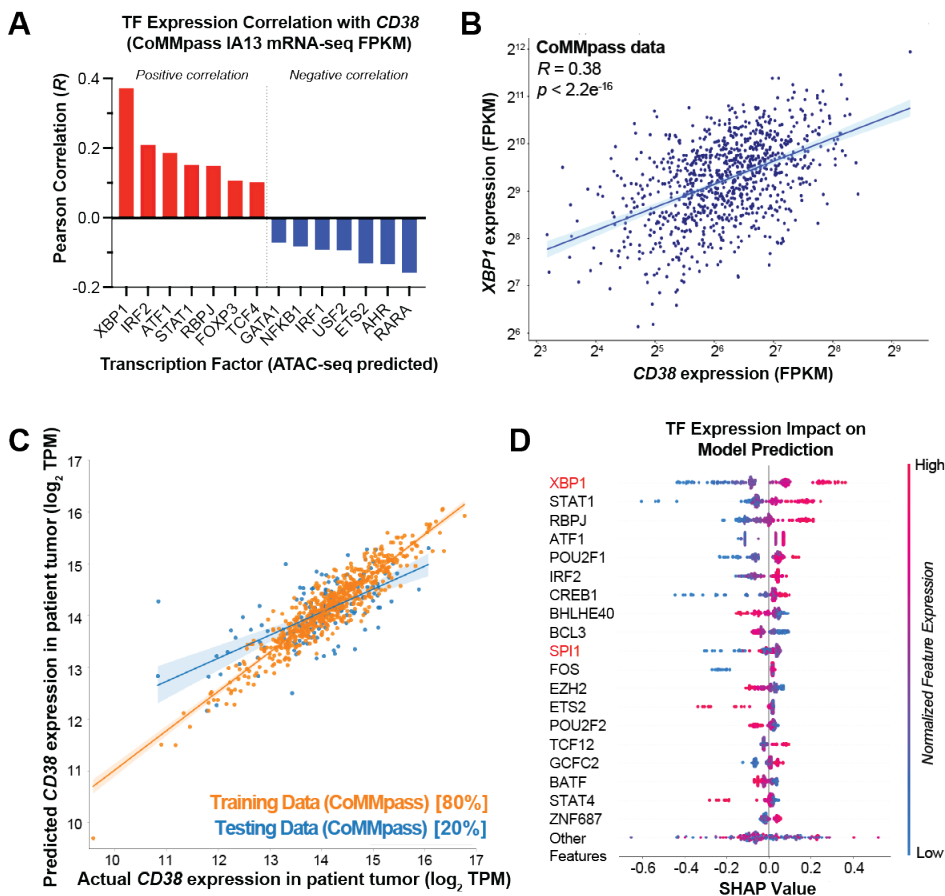

1  
2  
3  
4  
5  
6  
7  
8  
9  
10  
11  
12  
13  
14  
15  
16  
17  
18

**Figure 3. Patient-centered epigenetic analysis and machine learning predicts most potent transcriptional regulators of *CD38*.** **A.** 46 transcription factors predicted to bind to the *CD38* locus were derived from motif analysis of published ATAC-seq data (see Supplementary Figure 3). Gene expression of each transcription factor (TF) was correlated with *CD38* expression in the Multiple Myeloma Research Foundation (MMRF) CoMMpass database (release IA13), with RNA-seq data from *CD138*<sup>+</sup> enriched tumor cells at diagnosis ( $n = 664$  patients). Top predicted positive and negative regulators are shown based on Pearson correlation ( $R$ ). **B.** CoMMpass RNA-seq data illustrates strong positive correlation between *XBP1* and *CD38* expression. **C.** XGBoost machine learning model was used to extract features of transcription factor gene expression that best-model *CD38* expression in CoMMpass tumors (shown in  $\log_2$  TPM (Transcripts per Million)). 80% of data was used as a test set with 20% left out as a training set. Coefficient of variation ( $R^2$ ) for predictive model = 0.49 after five-fold cross validation. **D.** Shapley Additive Explanations (SHAP) analysis indicates transcription factors whose expression most strongly impacts *CD38* expression levels in CoMMpass tumors.

## FIGURE 4

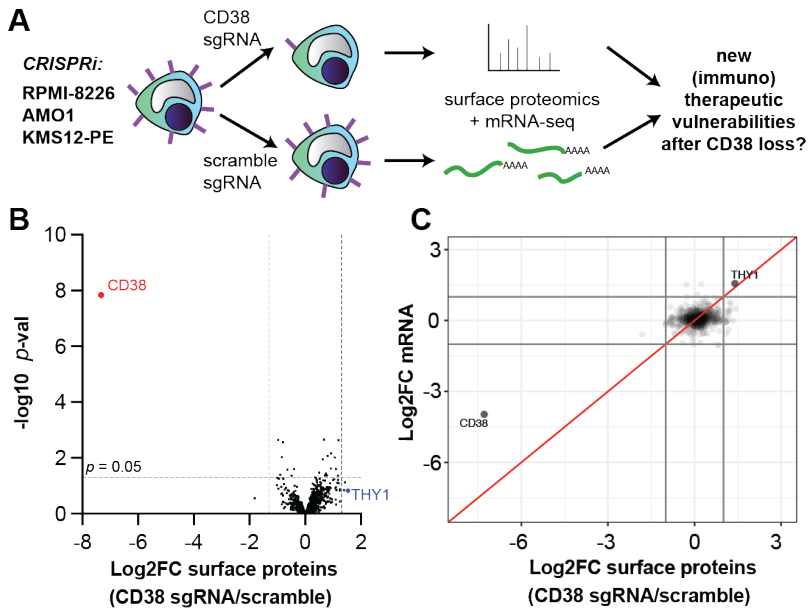

1  
2  
3 **Figure 4. Minimal alterations of the myeloma cell surface proteome after CD38 loss. A.**  
4 Schematic of “antigen escape profiling” approach to reveal new cell-surface therapeutic  
5 vulnerabilities in the context of CD38 downregulation. **B.** Cell surface capture proteomics  
6 comparing *CD38* knockdown vs. non-targeting sgRNA control, with aggregated data across three  
7 cell lines (CRISPRi-expressing RPMI-8226, AMO1, and KMS12-PE;  $n = 3$  replicates per cell line  
8 per sgRNA) reveals minimal changes in the cell surface proteome beyond CD38 knockdown at  
9 significance cutoff of  $p < 0.05$  and  $\log_2$  fold-change  $>|1.5|$ . **C.** Integrated analysis of cell surface  
10 proteomics and mRNA-seq ( $n = 2$  per cell line per guide) across three cell lines reveals the only  
11 consistent change at both protein and transcript level after *CD38* knockdown is *THY1/CD90*  
12 upregulation.  $\log_2$  fold-change cutoff =  $|1.5|$ .

## FIGURE 5

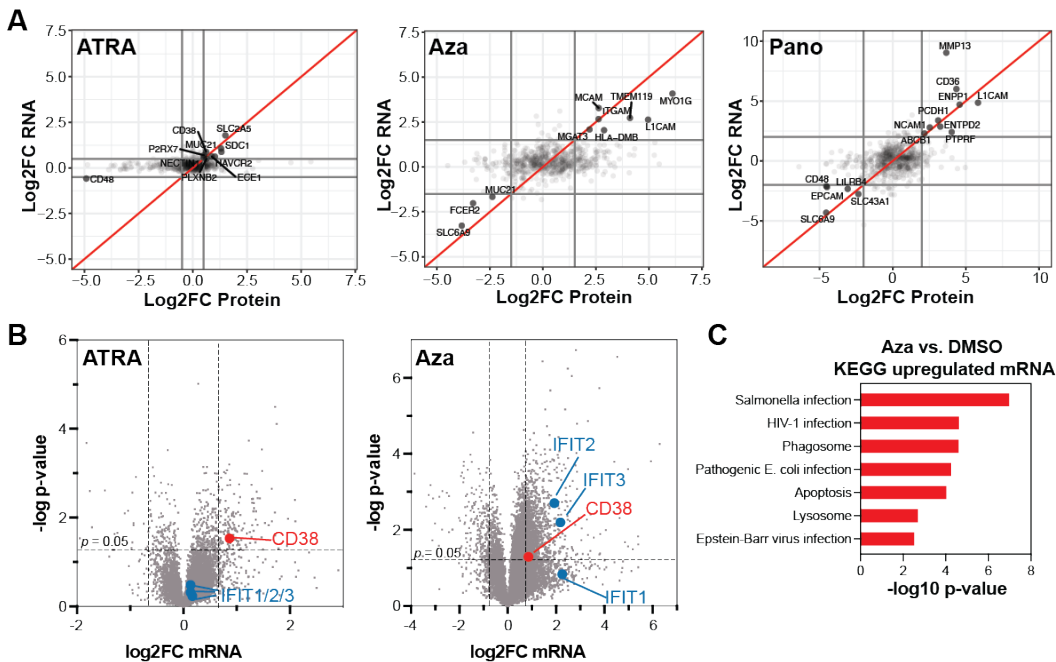

1  
2  
3 **Figure 5. ATRA drives CD38 upregulation with limited additional cellular impact while Aza**  
4 **leads to a broad interferon-mediated response. A.** Integrated mRNA-seq ( $n = 2$  per drug  
5 treatment) and cell surface proteomics ( $n = 2$  per drug treatment) across RPMI-8226 treatment with  
6 10 nM all-trans retinoic acid (ATRA), 2  $\mu$ M azacytidine (Aza), and 10 nM panobinostat (Pano).  
7 All plots are in comparison to control replicates treated with 0.1% DMSO. Doses chosen are based  
8 on those previously published to lead to CD38 upregulation for each agent. Data points shown are  
9 for proteins and genes corresponding to Uniprot-annotated membrane-spanning proteins. Log<sub>2</sub>-fold  
10 change cutoffs shown at  $|0.5|$  for ATRA and  $|2.0|$  for Aza and Pano to increase clarity of plots given  
11 many fewer changed genes with ATRA treatment. **B.** RNA-seq for same samples with ATRA or  
12 Aza treatment vs. DMSO but here showing all mapped genes, not just those annotated as  
13 membrane-spanning. Significance cutoff at  $p < 0.05$  with log<sub>2</sub> fold-change cutoff set at  $|0.8|$  to  
14 illustrate prominent differences above this level in transcriptome alteration after either ATRA or  
15 Aza treatment. **C.** KEGG analysis of genes from RNA-seq dataset meeting cutoff criteria of  $p <$   
16  $0.05$  and log<sub>2</sub> fold-change  $>0.8$  after Aza treatment.

FIGURE 6

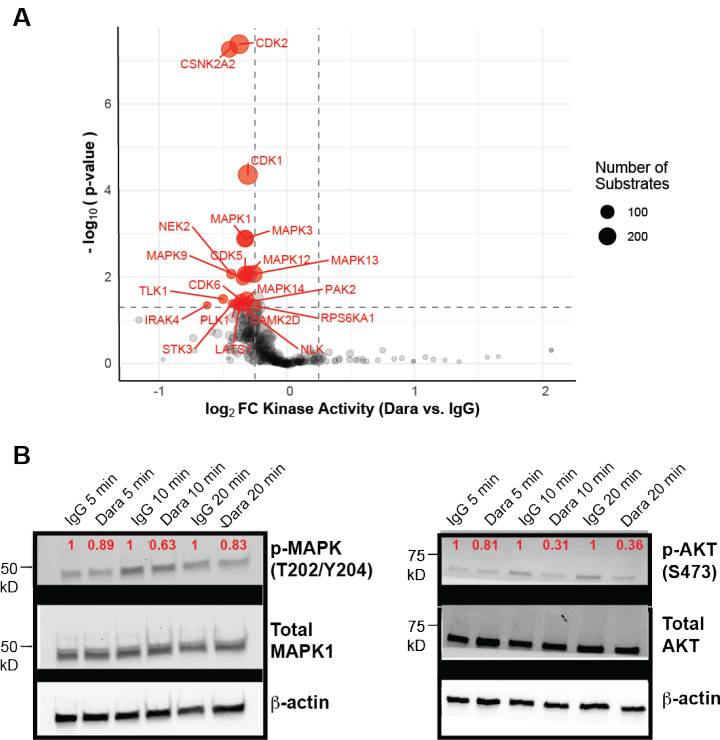

1  
2  
3 **Figure 6. Unbiased phosphoproteomics reveals downregulation of proliferative signaling after**  
4 **daratumumab treatment.** A. RPMI-8226 cells were treated with 20  $\mu$ M daratumumab or IgG1  
5 isotype control for 20 minutes ( $n = 3$  each) and then harvested for unbiased phosphoproteomics with  
6 immobilized metal affinity chromatography enrichment for phosphopeptide enrichment. Plot  
7 displays results of Kinase Substrate Enrichment Analysis, indicating modest decrease in  
8 phosphorylation of numerous predicted substrates of MAPK pathway kinases as well as cyclin-  
9 dependent kinases (cutoffs of  $p < 0.05$ ,  $\log_2$  fold-change  $> |0.5|$ ). B. Western blot in RPMI-8226 of  
10 MAPK (ERK1/2) (Thr202/Tyr204) relative to total MAPK demonstrates modest decrease in MAPK  
11 phosphorylation after 5, 10, or 15 min daratumumab (Dara) treatment; magnitude of change  
12 normalized to IgG1 control at each time point (red) appears consistent with phosphoproteomic data.  
13 C. Western blot of MM.1S cells treated with daratumumab and blotted for p-AKT (Ser473) and  
14 total AKT, with quantification of p-AKT relative to total AKT and normalized to IgG1 at each time  
15 point. All images representative of two independent Western blots.
